# Supplementary figures and images for: Small-molecule inhibitors identify the RAD52-ssDNA interaction as critical for recovery from replication stress and for survival of BRCA2 deficient cells
Source: eLife journal article supplement (doi:10.7554/elife.14740), 2016-07-19

**a**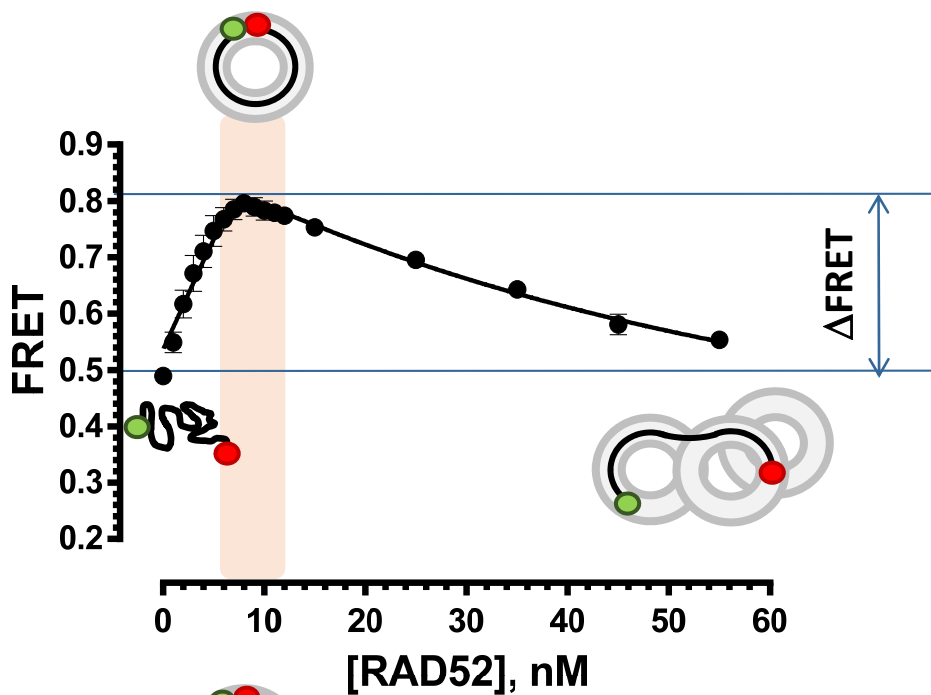**b**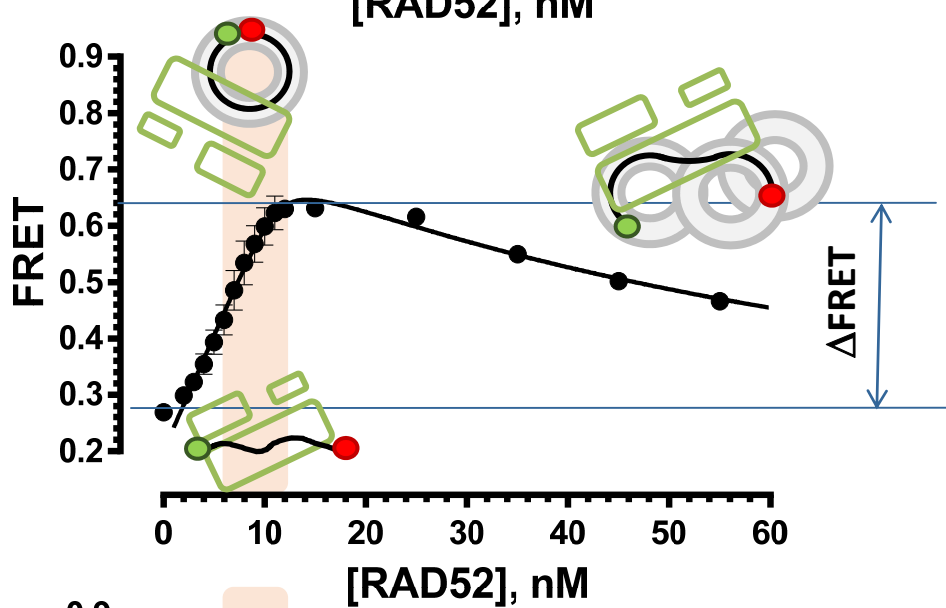**c**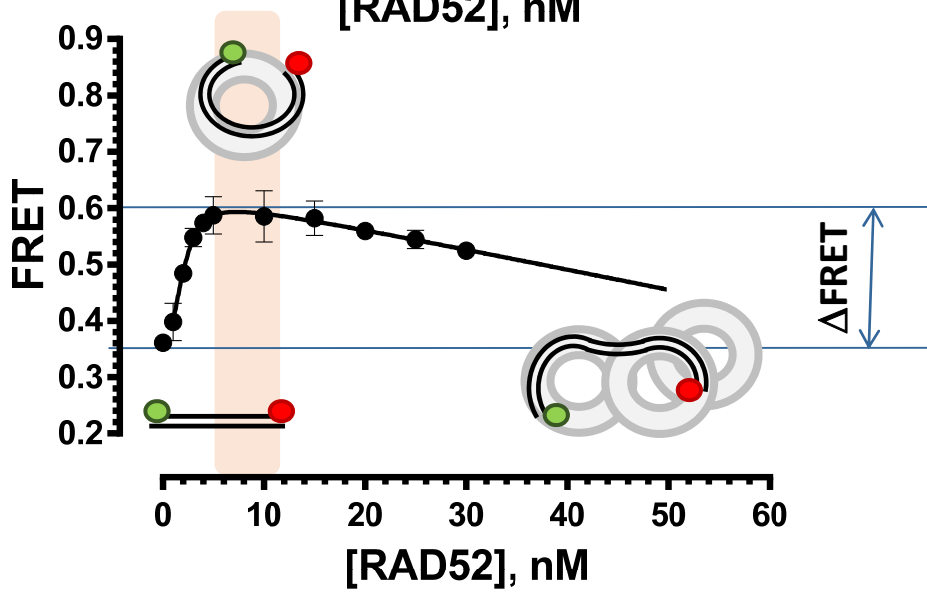

Supplement: supp [file elife_poa_e14740_Figure_2_Figure_Supplement_1.pdf › elife_poa_e14740_Figure_2_Figure_Supplement_1.pdf]

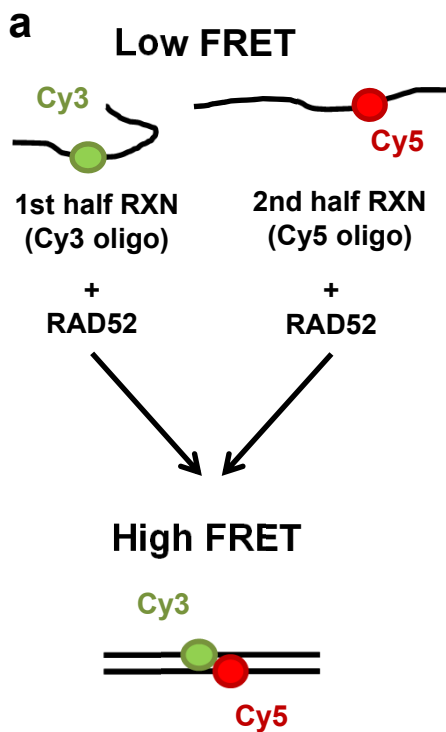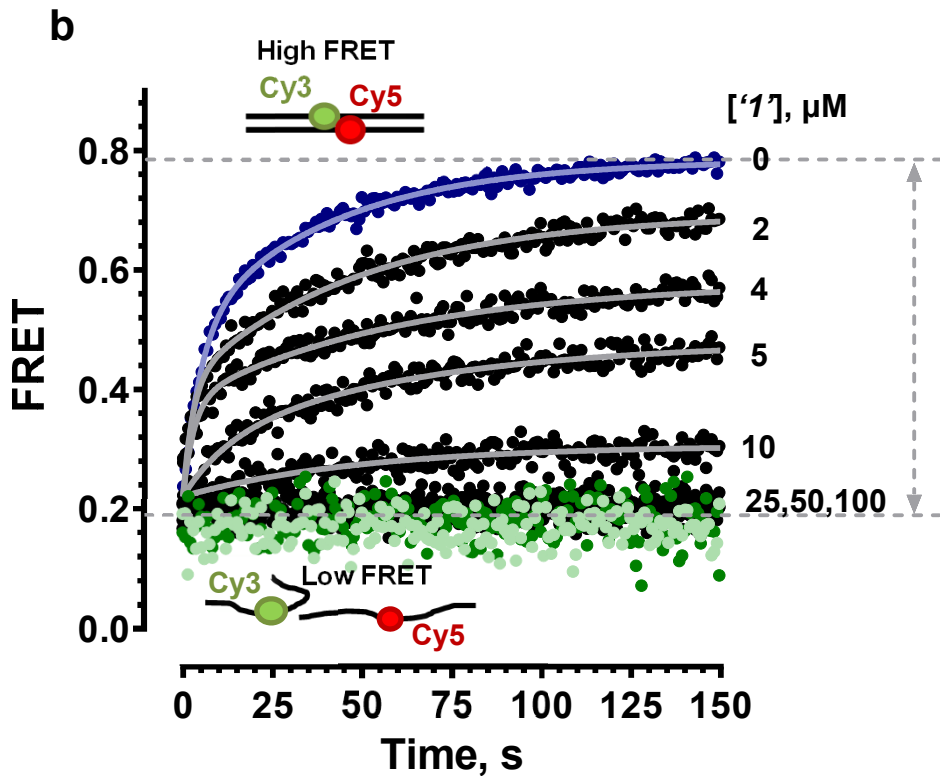

Supplement: supp [file elife_poa_e14740_Figure_2_Figure_Supplement_2.pdf › elife_poa_e14740_Figure_2_Figure_Supplement_2.pdf]

$R_h$  (app) nm

12  
11  
10  
9  
8

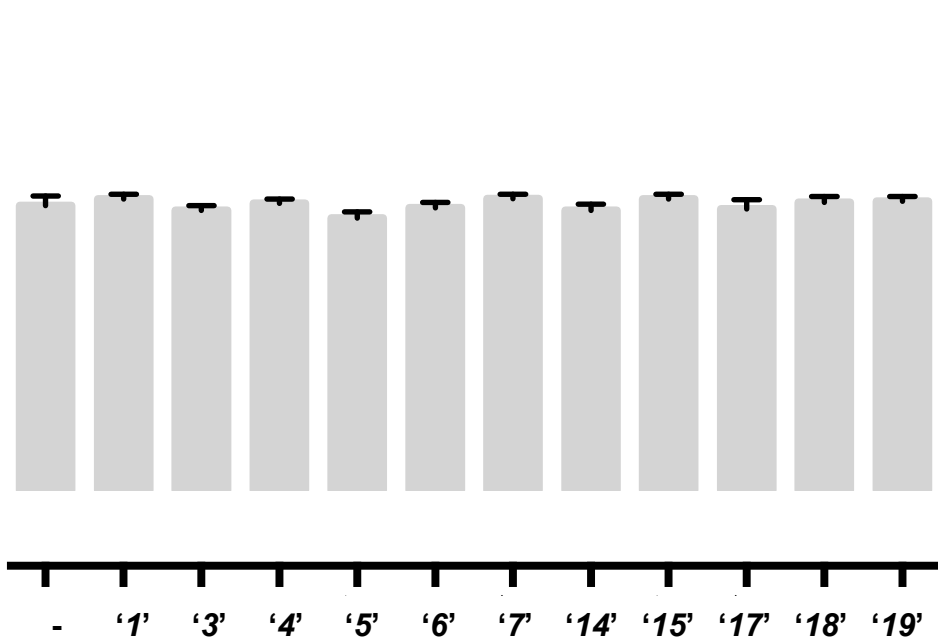

Supplement: supp [file elife_poa_e14740_Figure_2_Figure_Supplement_3.pdf › elife_poa_e14740_Figure_2_Figure_Supplement_3.pdf]

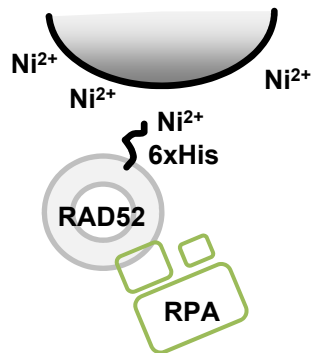

|              |   |   |   |   |   |   |   |   |   |
|--------------|---|---|---|---|---|---|---|---|---|
| <b>RAD52</b> | + | + | + | + | + | + | + | + | + |
| <b>RPA</b>   | + |   | + | + | + |   | + | + | + |
| <b>'1'</b>   |   |   |   | + |   |   |   | + |   |
| <b>'6'</b>   |   |   |   |   | + |   |   |   | + |

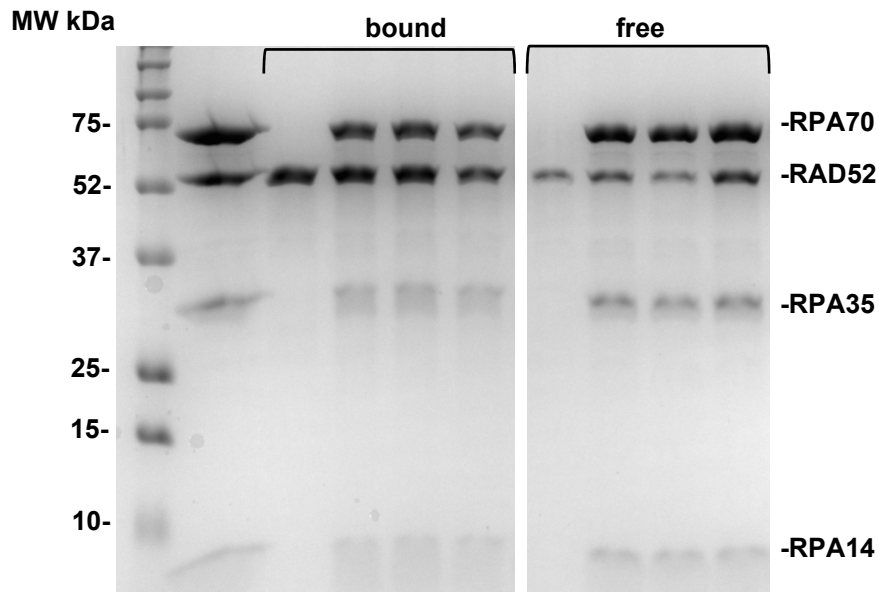

Supplement: supp [file elife_poa_e14740_Figure_2_Figure_Supplement_4.pdf › elife_poa_e14740_Figure_2_Figure_Supplement_4.pdf]

**a**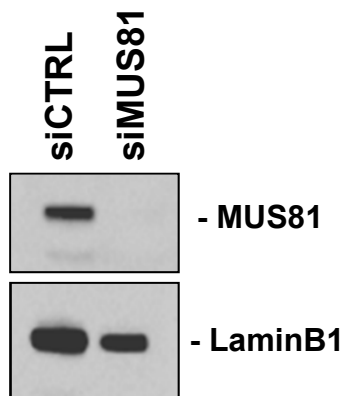**b**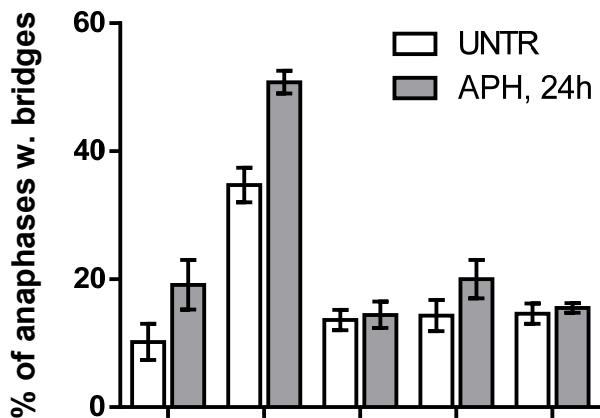

|                              |   |   |    |    |     |
|------------------------------|---|---|----|----|-----|
| siCtrl:                      | + | - | -  | -  | -   |
| siMUS81:                     | - | + | -  | -  | -   |
| [ <i>'1</i> ], $\mu\text{M}$ | - | - | 10 | 25 | 100 |

**c**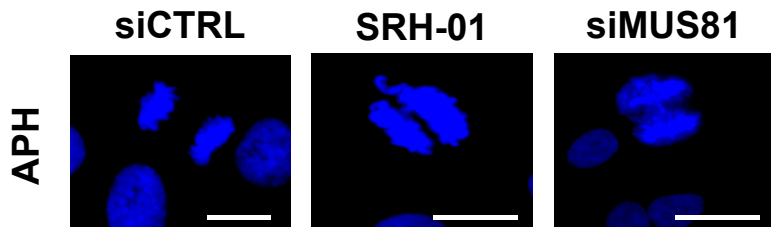

Supplement: supp [file elife_poa_e14740_Figure_5_Figure_Supplement_1.pdf › elife_poa_e14740_Figure_5_Figure_Supplement_1.pdf]
